# Supplementary material for: Sustainable construction: admicellar catalysed synthesis of pyrimido[4,5-b]quinolines in an aqueous system
Source: Royal Society of Chemistry journal article supplement (doi:10.1039/c5ra00791g), 2015-01-01
Supplement: c5ra00791g1.pdf [file c5ra00791g1.pdf]

Please see the [correction article](#) associated with this work, which contains the correct characterization data for compounds 4a–4l. (Part of this data was previously available as ESI. No additional ESI exists for this work.)
